# Supplementary material for: Анализ законопроектов sopa и Pipa в рамках освещения вопросов международного правового регулирования отношений в информационной сфере
Source: Hindawi journal article supplement (doi:10.1155/2020/7073805), 2012-01-01

**A**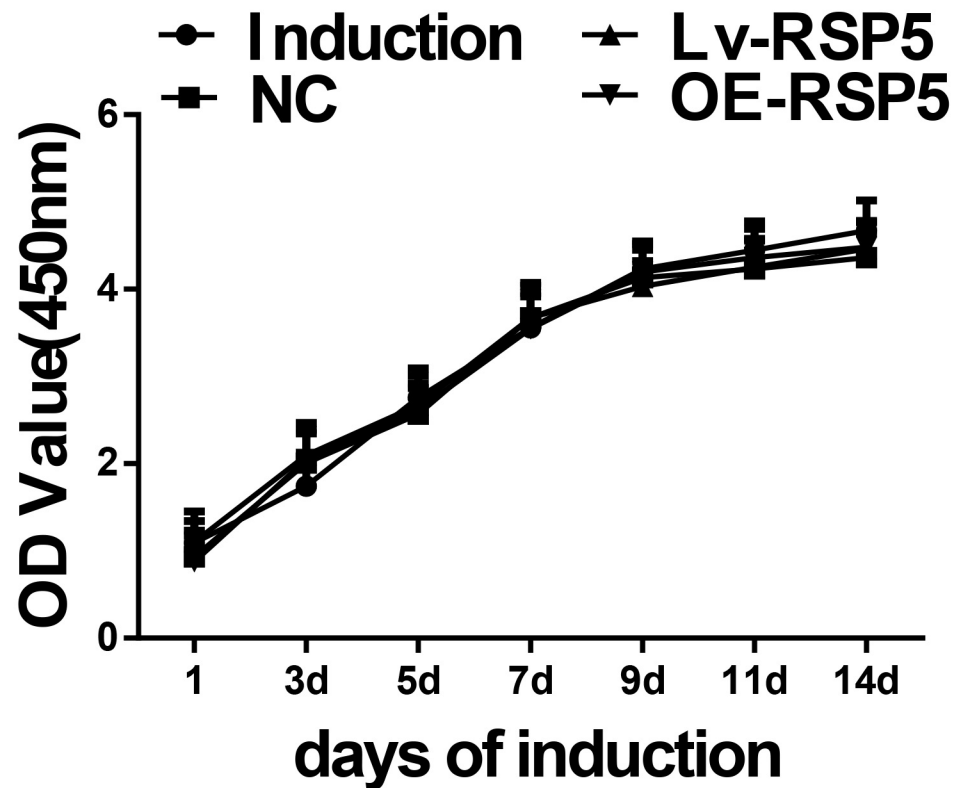**B**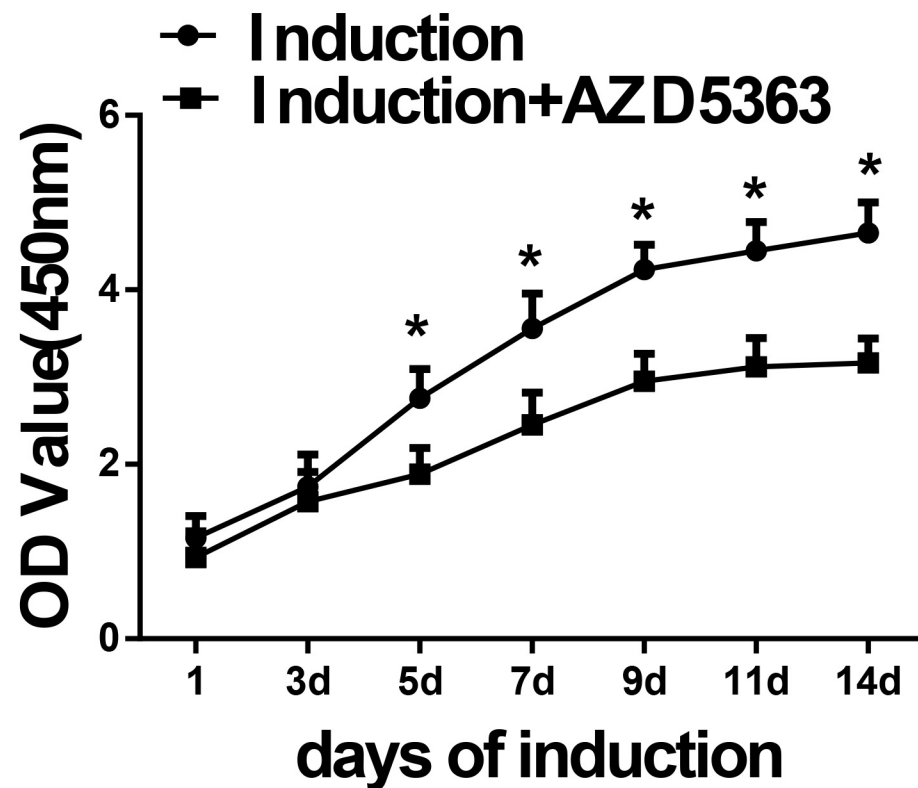

Supplement: f1 [file 7073805.f1.pdf]
